# Supplementary material for: Controllable synthesis and biomedical applications of bismuth-based nanospheres: enhanced photothermal therapy and CT imaging efficiency
Source: Royal Society of Chemistry journal article supplement (doi:10.1039/d4nr04024d), 2024-12-09
Supplement: d4nr04024d1.pdf [file d4nr04024d1.pdf]

## Supporting Information

### **Controllable synthesis and biomedical applications of bismuth-based nanospheres: enhanced photothermal therapy and CT imaging efficiency**

Dongxun Chen<sup>†a</sup>, Baowang Miao<sup>†b,c</sup>, Guidong Zhu<sup>b</sup>, Yanjie Liang<sup>\*a</sup> and Chengwei Wang<sup>\*b</sup>

<sup>a</sup>Key Laboratory for Liquid-Solid Structure Evolution and Processing of Materials, Ministry of Education, Shandong University, Jinan 250061, China.

<sup>b</sup>Department of Neurosurgery, The Second Hospital of Shandong University, Jinan 250033, China.

<sup>c</sup>Department of Neurosurgery, Yiyuan County People's Hospital, Zibo 256100, China.

\*Corresponding authors: Yanjie Liang, Chengwei Wang

E-mail: [yanjie.liang@sdu.edu.cn](mailto:yanjie.liang@sdu.edu.cn); [wangchengwei@sdu.edu.cn](mailto:wangchengwei@sdu.edu.cn)

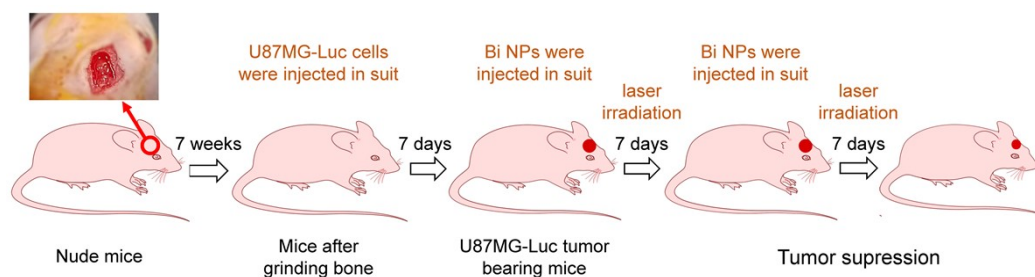

**Scheme S1.** Schematic diagram of photothermal therapy in tumor-bearing mice.

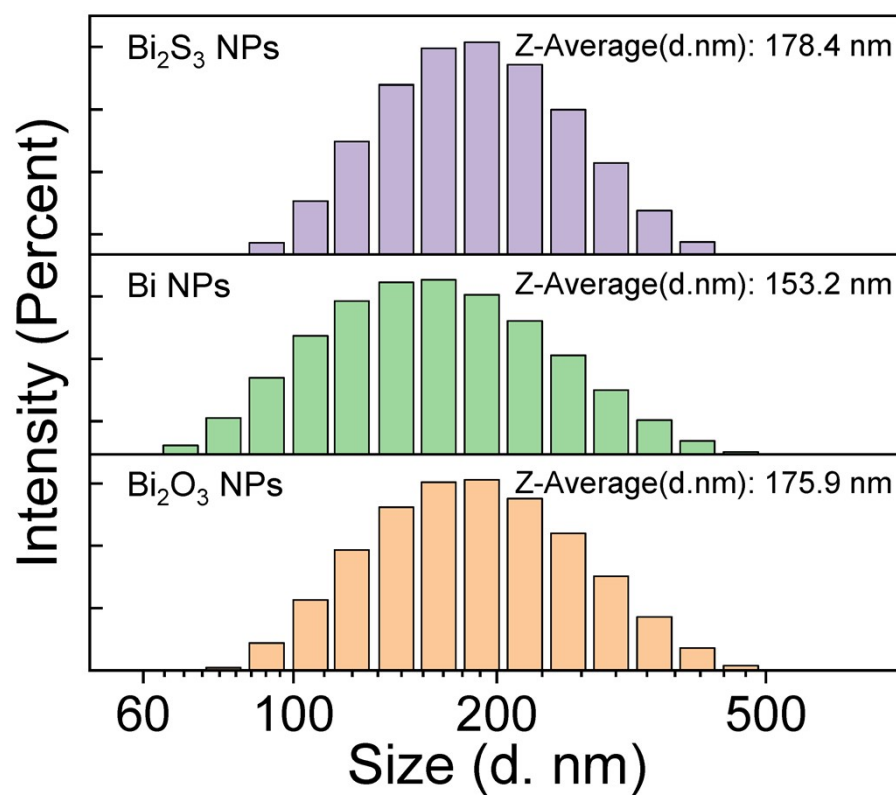

**Figure S1.** Typical DLS curve of the size distribution of the obtained  $\text{Bi}_2\text{S}_3$  NPs, Bi NPs, and  $\text{Bi}_2\text{O}_3$  NPs.

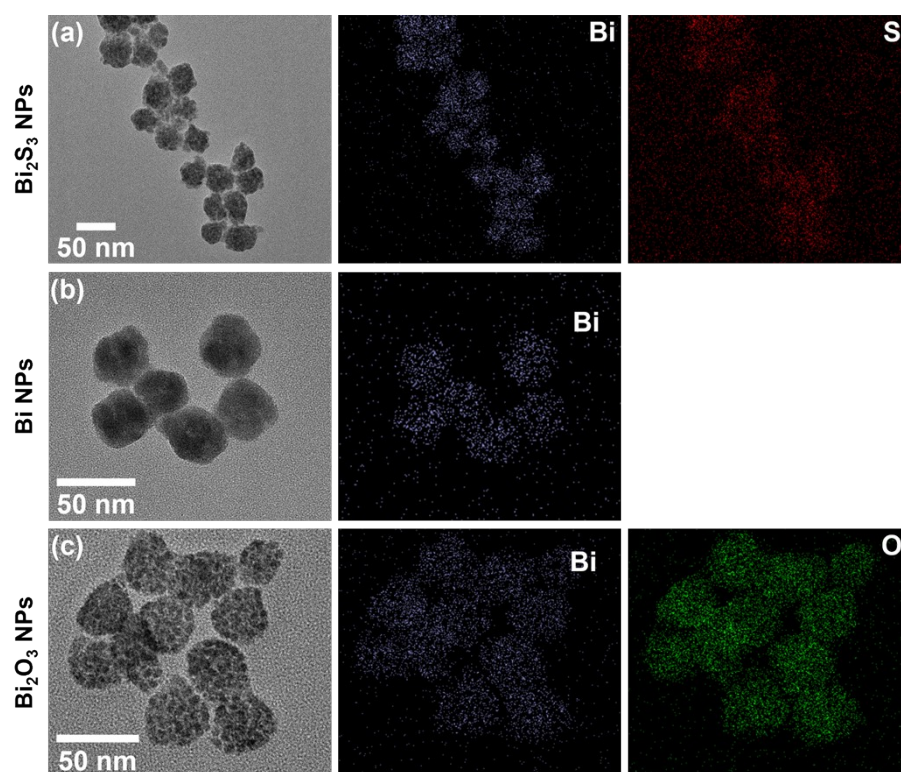

**Figure S2.** Elemental mapping images of the  $\text{Bi}_2\text{S}_3$  NPs (a), Bi NPs (b), and  $\text{Bi}_2\text{O}_3$  NPs (c), respectively.

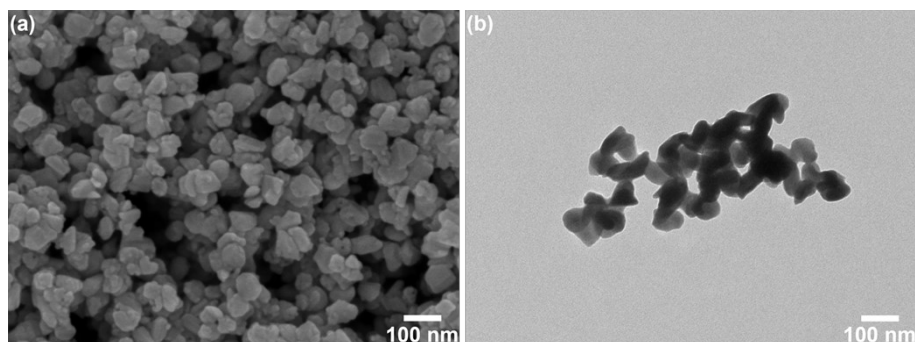

**Figure S3.** (a) SEM images and (b) TEM images of the  $\text{Bi}_2\text{S}_3$  NPs without PVP.

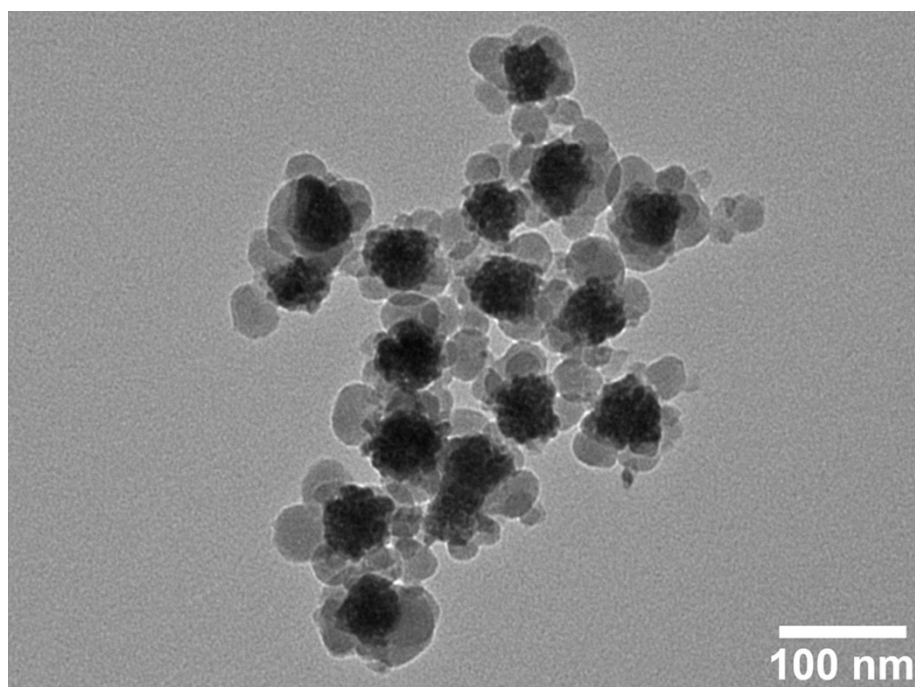

**Figure S4.** TEM images of the Bi<sub>2</sub>S<sub>3</sub>@SiO<sub>2</sub> NPs.

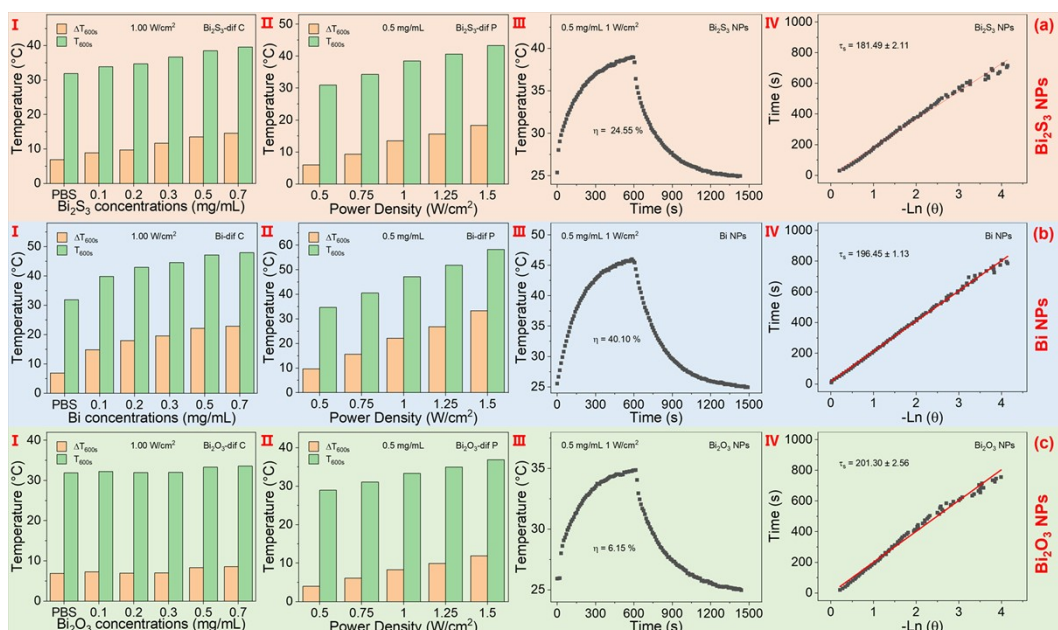

**Figure S5.** The temperatures after 600 s of irradiation by 808nm laser for solutions of Bi-based NPs at different concentrations (a-I, b-I, and c-I). The temperatures after 600 s of irradiation by 808nm laser at different working power densities for Bi-based NPs solution (0.5 mg mL<sup>-1</sup>) are represented as (a-II, b-II, and c-II). The photothermal conversion efficiency of Bi-based NPs under 808 nm laser (a-III, b-III, and c-III). The plot of cooling time ( $t$ ) versus the negative natural logarithm of the temperature driving force ( $\theta$ ) obtained from the cooling stage (a-IV, b-IV, and c-IV).

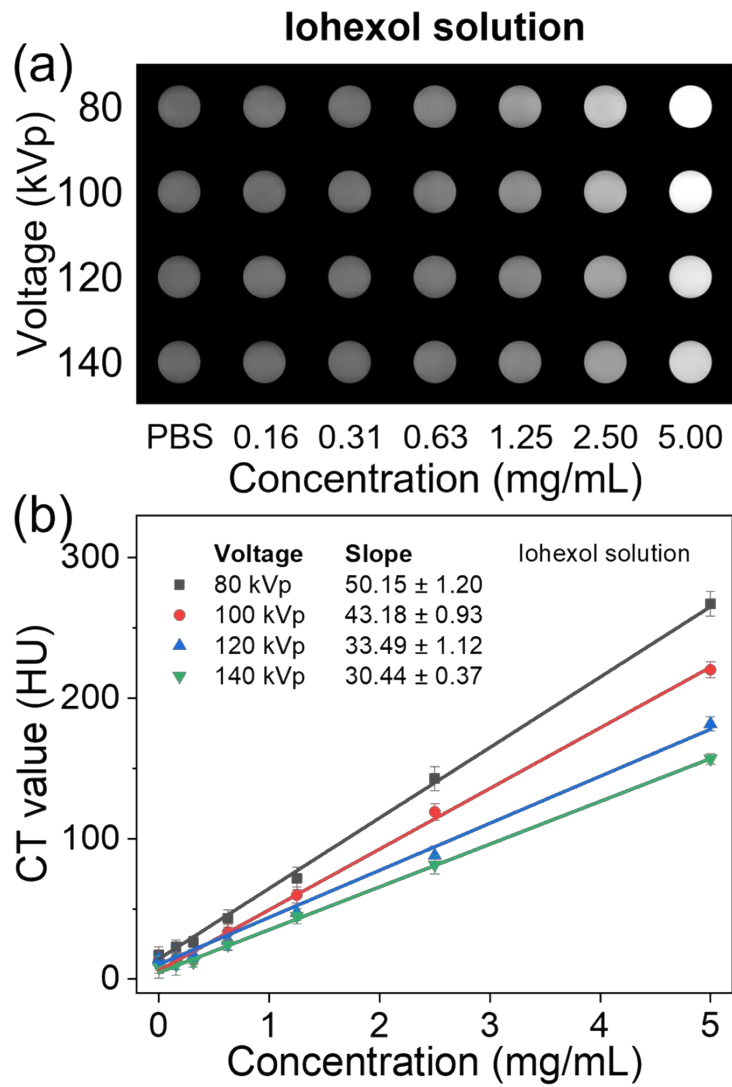

**Figure S6.** In vitro CT images of the commercial iohexol injection with different concentrations and work voltages.



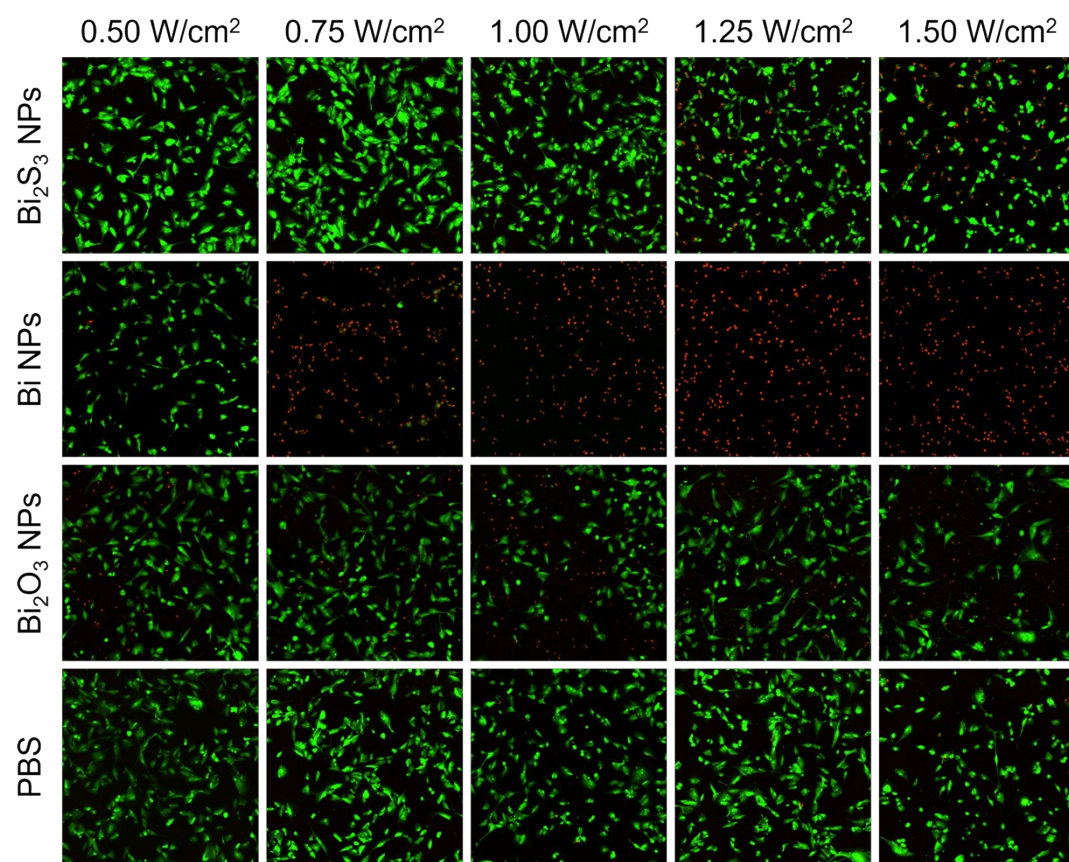

**Figure S7.** Fluorescence micrographs of Bi-based nanospheres at different power density NIR laser irradiation.

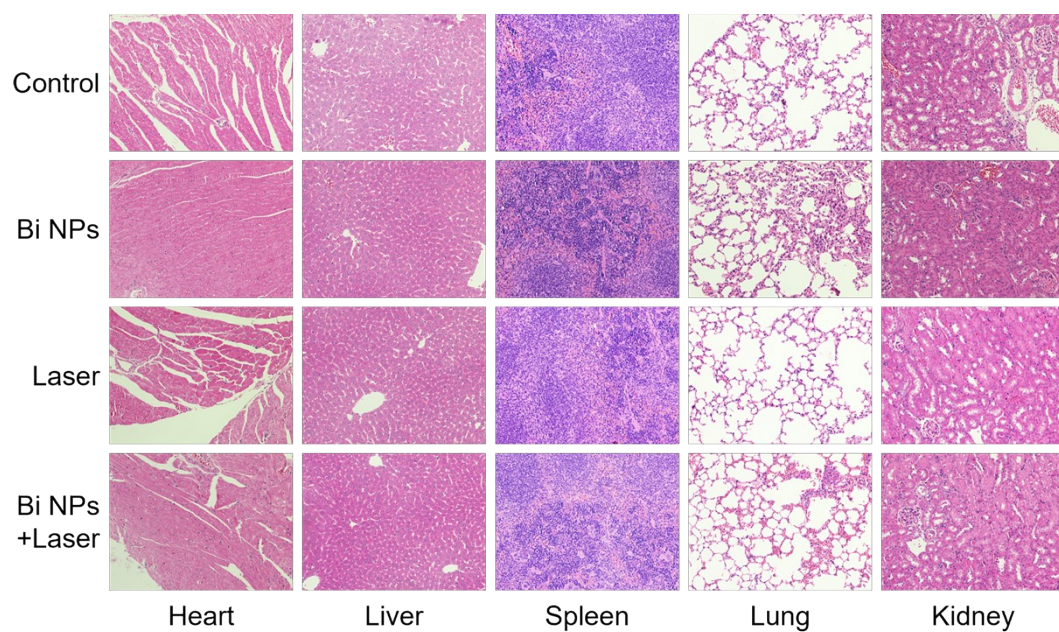

**Figure S8** H&E assay image of major organs from each group after 14 days of treatment.
